# Supplementary material for: Mesophiles vs. Thermophiles: Untangling the Hot Mess of Intrinsically Disordered Proteins and Growth Temperature of Bacteria
Source: Int J Mol Sci. 2024 Feb 7;25(4):2000. doi: 10.3390/ijms25042000 (PMC10889376; doi:10.3390/ijms25042000)
Supplement: Supplementary file 1 [file ijms-25-02000-s001.zip › ijms-2850779-supplementary.pdf]

Supplementary materials

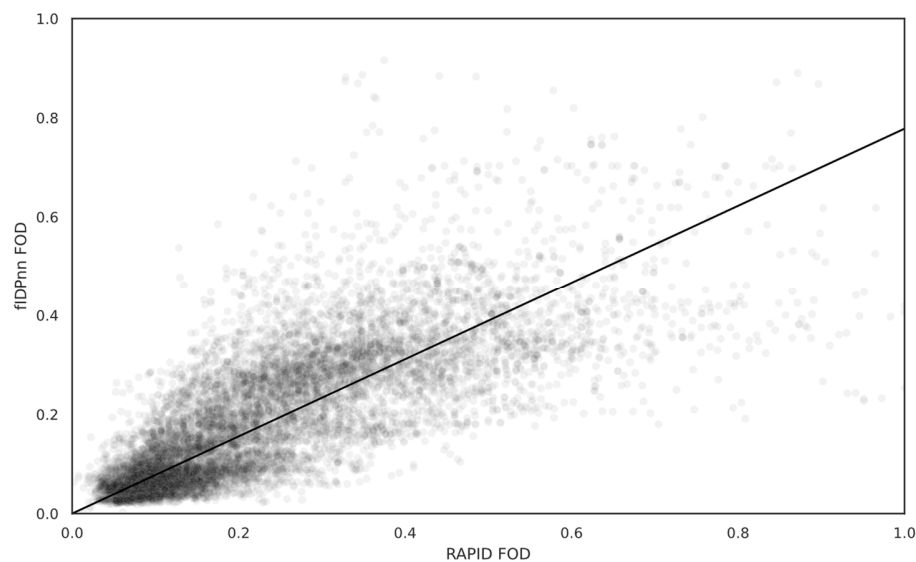

Figure S1. Scatter plot of FOD contrast / OGT contrast relationship.

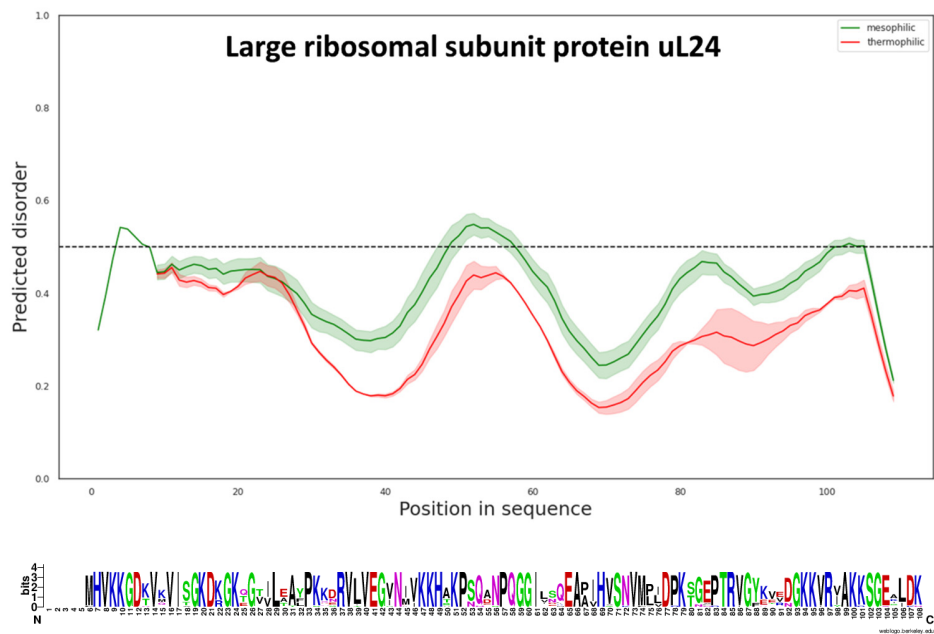

Figure S2. Aligned disorder (uL24) and corresponding WebLogo.

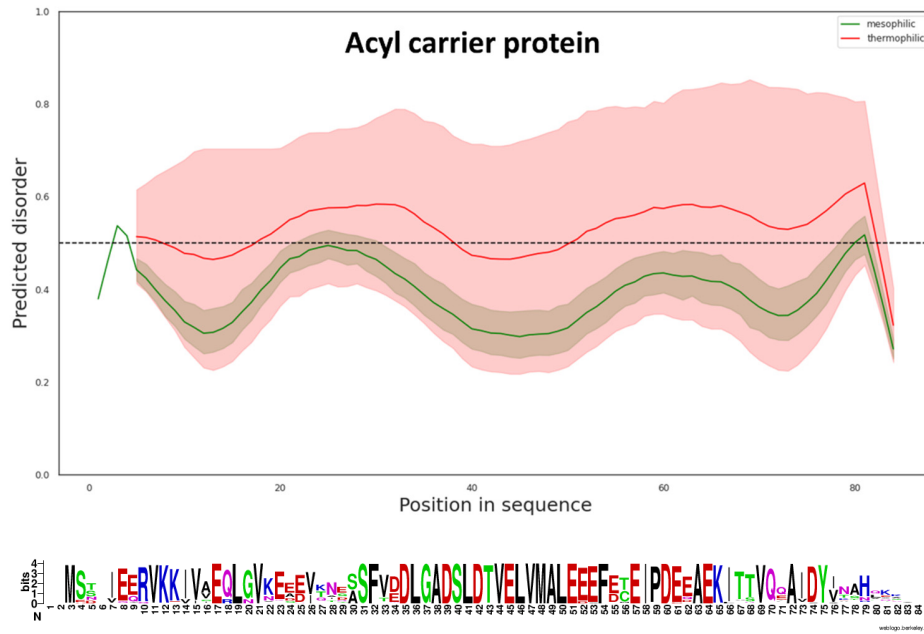

**Figure S3.** Aligned disorder (Acyl carrier protein) and corresponding WebLogo.

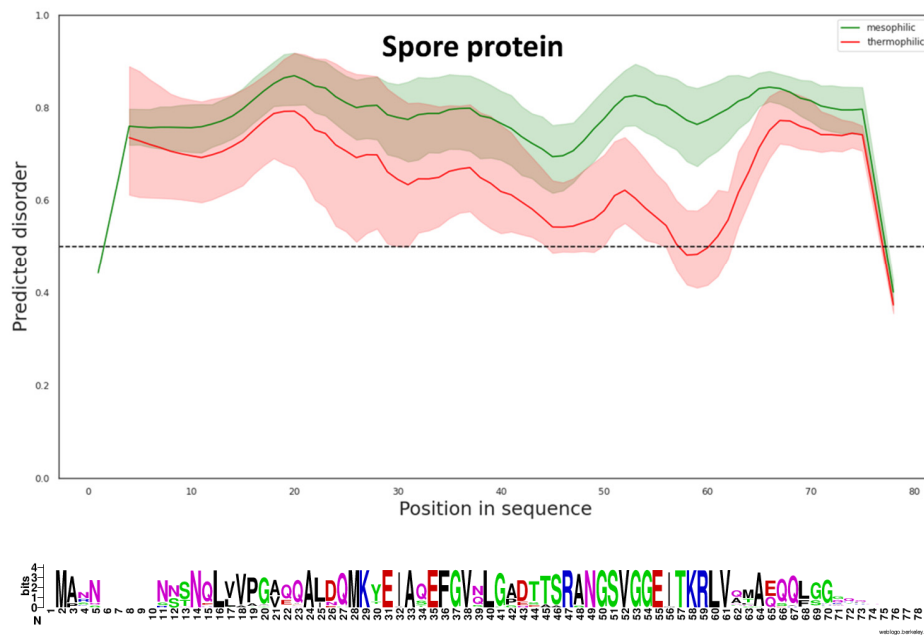

**Figure S4.** Aligned disorder (Spore protein) and corresponding WebLogo.

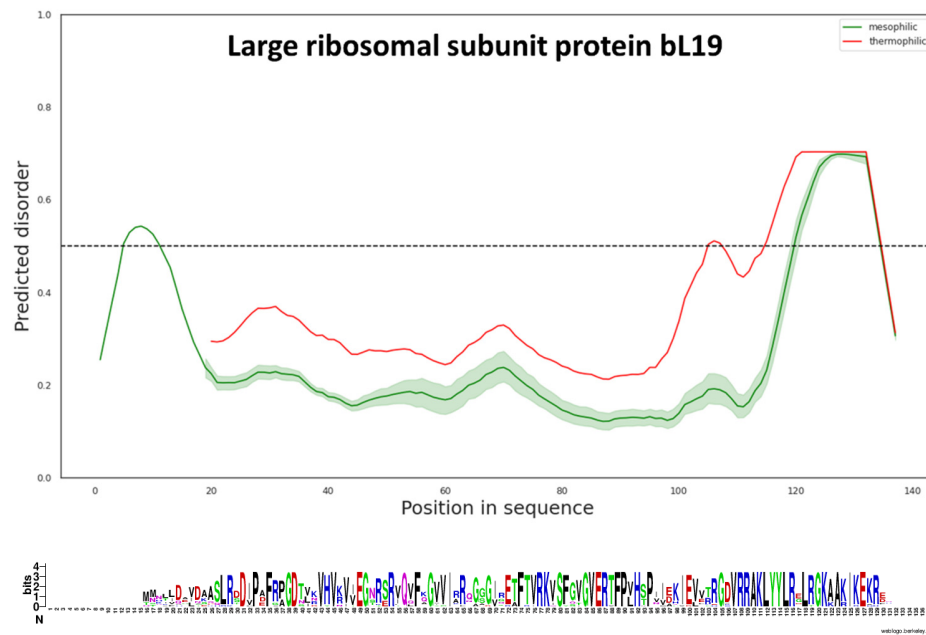

**Figure S5.** Aligned disorder (bL19) and corresponding WebLogo.

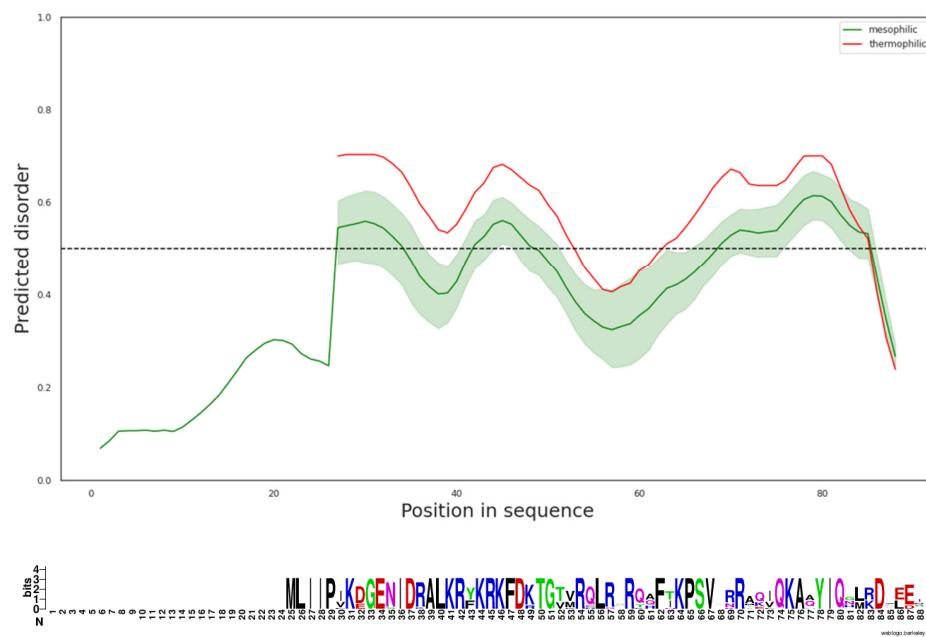

**Figure S6.** Aligned disorder (bS21) and corresponding WebLogo.

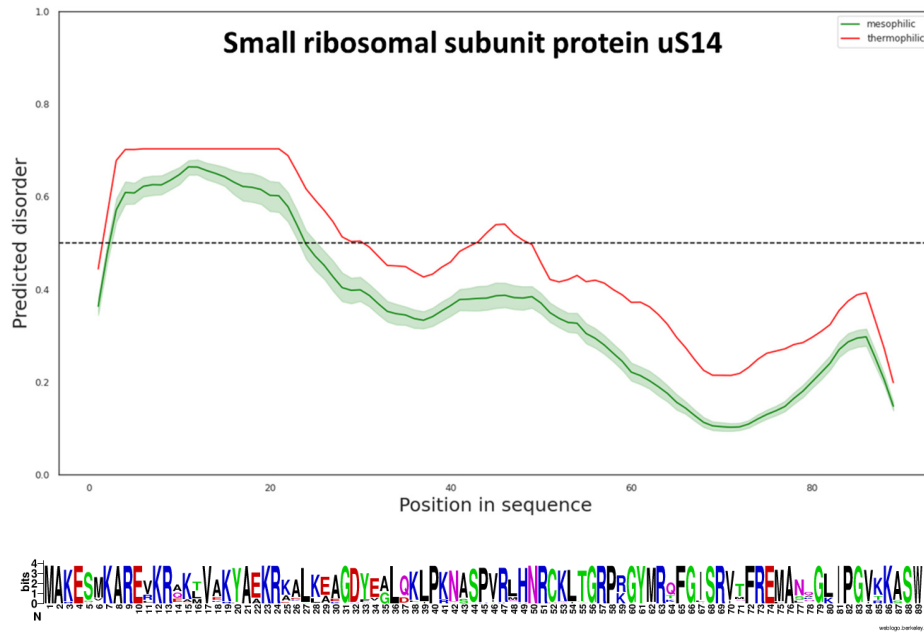

**Figure S7.** Aligned disorder (uS14) and corresponding WebLogo.

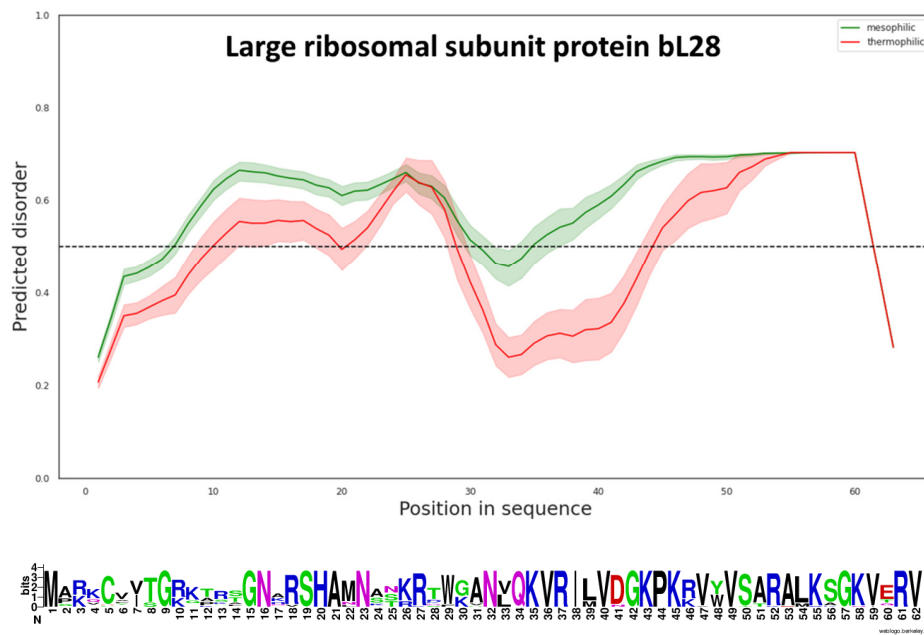

**Figure S8.** Aligned disorder (bL28) and corresponding WebLogo.

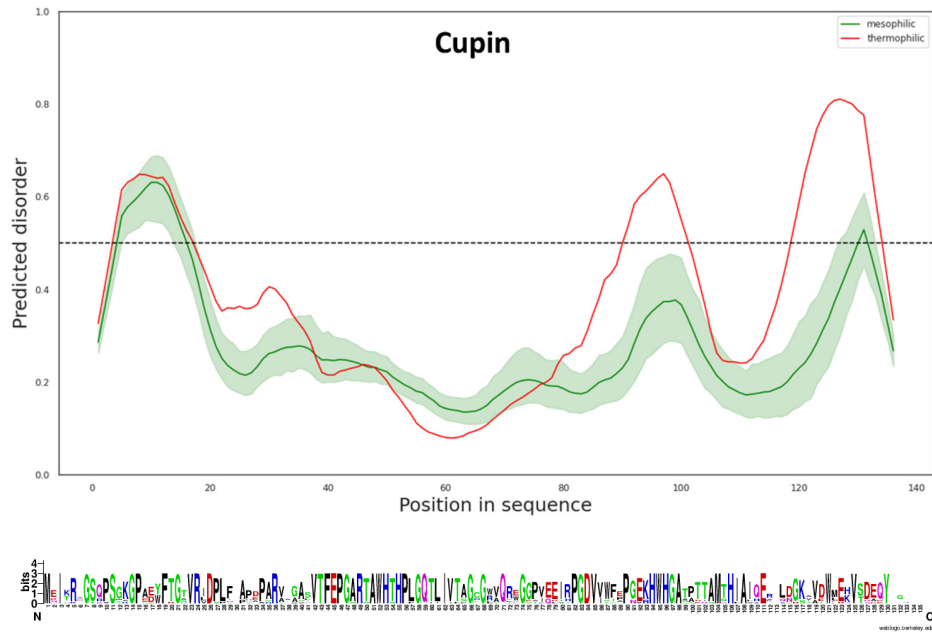

**Figure S9.** Aligned disorder (Cupin) and corresponding WebLogo.

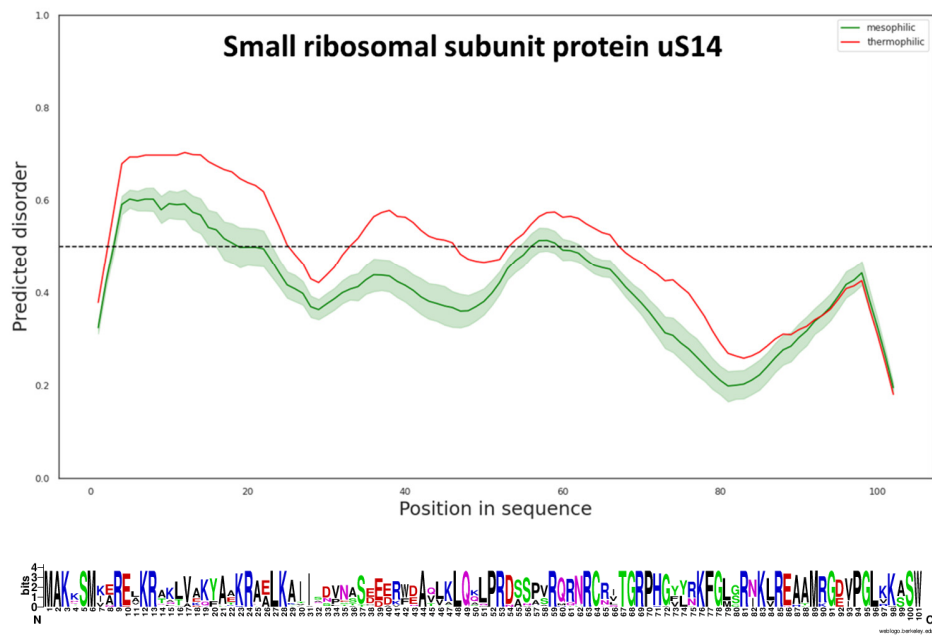

**Figure S10.** Aligned disorder (uS14) and corresponding WebLogo.

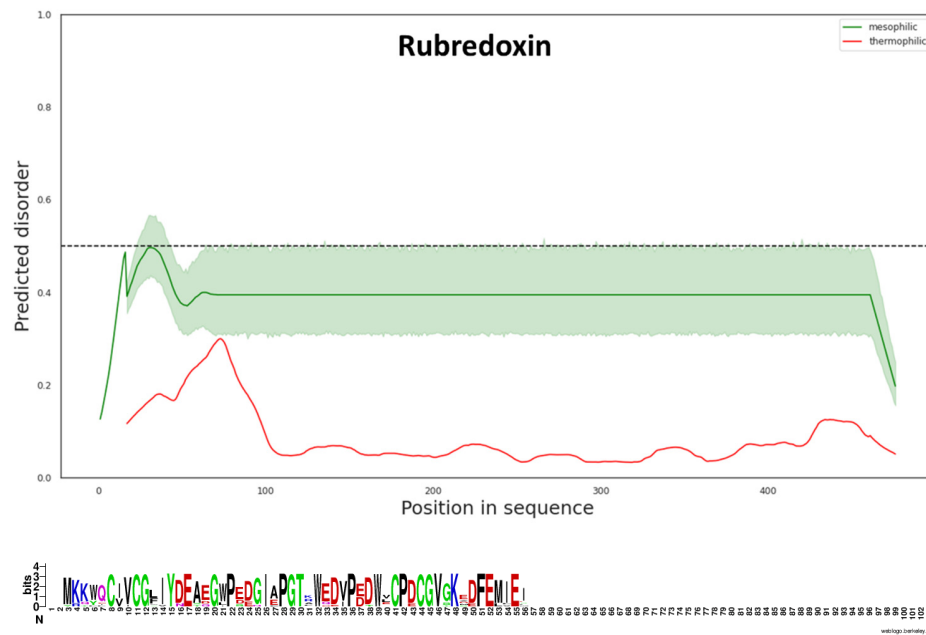

**Figure S11.** Aligned disorder (Rubredoxin) and corresponding WebLogo. The WebLogo has been limited to 100 first positions because of truncation.
